# Supplementary material for: Genome-Wide Association Study Reveals Major SNPs Associated with Pollen Viability and Spikelet Fertility in Wheat under Heat Stress
Source: Research Square preprint supplement (doi:10.21203/rs.3.rs-7577963/v1), 2025-10-15
Supplement: Supplementary file 1 [file 3adc4c1cb79633abe9111ccd.xlsx]

## Sheet: Table S1_materials
Table S1. List of genotypes and their source of origin
Code	Genotype	Classification
GRDC001	92FS-16	AGG
GRDC002	AEGYLOPS14257	AGG
GRDC003	AFGHANISTAN7	AGG
GRDC004	AHGAF	AGG
GRDC005	ALBIDUM24	AGG
GRDC006	Al-wheat	CCV
GRDC007	ANNUELLO	ACV
GRDC008	ARTEMOVKA	AGG
GRDC009	ASCOT	ACV
GRDC010	AUS19392	AGG
GRDC011	AUS19393	AGG
GRDC012	AUS19394	AGG
GRDC013	AUS19395	AGG
GRDC014	AUS19396	AGG
GRDC015	AUS19397	AGG
GRDC016	AUS19398	AGG
GRDC017	AUS19399	AGG
GRDC018	AUS19400	AGG
GRDC019	AUS19401	AGG
GRDC020	AUS19402	AGG
GRDC021	AUS19403	AGG
GRDC022	AUS19719	AGG
GRDC023	AXE	ACV
GRDC024	BALLISTA	ACV
GRDC025	BANKS	ACV
GRDC026	BARHAM	ACV
GRDC027	BAXTER	ACV
GRDC028	BECKOM	ACV
GRDC029	BOREE	ACV
GRDC030	BORLAUG 100	ACV
GRDC031	BUKOVINKA	AGG
GRDC032	CALIBRE	ACV
GRDC033	CARINYA	ACV
GRDC034	CATAPULT	ACV
GRDC035	CAZ53	AGG
GRDC036	CHIEF CL PLUS	ACV
GRDC037	CONDO	ACV
GRDC038	CONDOR	ACV
GRDC039	COOK	ACV
GRDC040	COOLAH	ACV
GRDC041	COOTA	ACV
GRDC042	COSMICK	ACV
GRDC043	CUNNINGHAM	ACV
GRDC044	CUTLASS	ACV
GRDC045	DENISON	ACV
GRDC046	DERRIMUT	ACV
GRDC047	DEVIL	ACV
GRDC048	DIAMONDBIRD	ACV
GRDC049	DOLLARBIRD	ACV
GRDC050	DS FARADAY	ACV
GRDC051	DS PASCAL	ACV
GRDC052	DS TULL	ACV
GRDC053	E.M.S.SUMMIT70-8	AGG
GRDC054	EAGLE	ACV
GRDC055	EG JET	ACV
GRDC056	EG TITANIUM	ACV
GRDC057	EGA GREGORY	ACV
GRDC058	EGRET	ACV
GRDC059	ELLISON	ACV
GRDC060	ELMORE CL PLUS	ACV
GRDC061	EMU ROCK	ACV
GRDC062	EXALIBUR	ACV
GRDC063	EXITOB	AGG
GRDC064	FEDERATION	ACV
GRDC065	FRAME	ACV
GRDC066	FRETES	AGG
GRDC067	GAMENYA	ACV
GRDC068	GATCHER	ACV
GRDC069	GLADIUS	ACV
GRDC070	Glover	ACV
GRDC071	GRENADE CL PLUS	ACV
GRDC072	H-002	CL
GRDC073	H-004	CL
GRDC074	H-006	CL
GRDC075	H-008	CL
GRDC076	H-010	CL
GRDC077	H-011	CL
GRDC078	H-020	CL
GRDC079	H-021	CL
GRDC080	H-031	CL
GRDC081	H-033	CCV
GRDC082	H-034	CCV
GRDC083	H-041	CCV
GRDC084	H-042	CCV
GRDC085	H-043	CCV
GRDC086	H-045	CCV
GRDC087	H-046	CL
GRDC088	H-047	CL
GRDC089	H-048	CL
GRDC090	H-049	CL
GRDC091	H-051	CL
GRDC092	H-052	CL
GRDC093	H-053	CL
GRDC094	H-054	CL
GRDC095	H-056	CL
GRDC096	H-057	CL
GRDC097	H-058	CL
GRDC098	H-059	CL
GRDC099	H-060	CL
GRDC100	H-061	CL
GRDC101	H-062	CL
GRDC102	H-064	CL
GRDC103	H-065	CL
GRDC104	H-066	CL
GRDC105	H-068	CL
GRDC106	H-069	CCV
GRDC107	H-070	CCV
GRDC108	H-071	CL
GRDC109	H-073	CCV
GRDC110	H-074	CCV
GRDC111	H-076	CCV
GRDC112	H-077	CL
GRDC113	H-078	CL
GRDC114	H-079	CL
GRDC115	H-080	CL
GRDC116	H-082	CL
GRDC117	H-083	CCV
GRDC118	H-084	CCV
GRDC119	H-085	CCV
GRDC120	H-086	CCV
GRDC121	H-088	CCV
GRDC122	H-089	CCV
GRDC123	H-090	CL
GRDC124	H-091	AGG
GRDC125	H-093	CCV
GRDC126	H-094	CCV
GRDC127	H-095	AGG
GRDC128	H-103	AGG
GRDC129	H-107	CCV
GRDC130	H-109	CCV
GRDC131	H-110	CL
GRDC132	H-111	CL
GRDC133	H-112	CCV
GRDC134	H-113	CCV
GRDC135	H-114	CCV
GRDC136	H-115	CL
GRDC137	H-125	CCV
GRDC138	H-126	CL
GRDC139	H-127	CCV
GRDC140	H-131	CCV
GRDC141	H-132	CCV
GRDC142	H-133	CCV
GRDC143	H-135	CCV
GRDC144	H-135W	CCV
GRDC145	H-136	CCV
GRDC146	H-137	CCV
GRDC147	H-138	CCV
GRDC148	H-141	CCV
GRDC149	H-142	CCV
GRDC150	H-149	CL
GRDC151	H-151	CL
GRDC152	H-152	CL
GRDC153	H-154	CL
GRDC154	H-160	CL
GRDC155	H-161	CL
GRDC156	H-165	CL
GRDC157	H-167	CL
GRDC158	H-168	CL
GRDC159	H-176	CL
GRDC160	H-177	CL
GRDC161	H-178	CL
GRDC162	H-180	CL
GRDC163	H-181	CL
GRDC164	H-183	CL
GRDC165	H-184	CL
GRDC166	H-185	CL
GRDC167	H-186	CL
GRDC168	H-187	CL
GRDC169	H-189	CL
GRDC170	H-191	CCV
GRDC171	H-192	CCV
GRDC172	H-193	CL
GRDC173	H-194	CL
GRDC174	H-196	CL
GRDC175	H-199	CL
GRDC176	H-203	CL
GRDC177	H-205	CL
GRDC178	H-207	CCV
GRDC179	H-208	CCV
GRDC180	H-209	CCV
GRDC181	H-210	CCV
GRDC182	H-211	CL
GRDC183	H-212	CCV
GRDC184	H-214	CCV
GRDC185	H-215	CCV
GRDC186	H-216	CCV
GRDC187	H-220	CCV
GRDC188	H-221	CCV
GRDC189	H-223	CL
GRDC190	H-225	CL
GRDC191	H-227	CL
GRDC192	H-229	CL
GRDC193	H-230	CL
GRDC194	H-231	CL
GRDC195	H-233	CL
GRDC196	H-235	CL
GRDC197	H-236	CL
GRDC198	H-237	CL
GRDC199	H-238	CL
GRDC200	H-239	CL
GRDC201	H-240	CL
GRDC202	H-241	CL
GRDC203	H-246	CL
GRDC204	H-247	CL
GRDC205	H-249	CL
GRDC206	H-250	CL
GRDC207	H45	CL
GRDC208	HALBERD	ACV
GRDC209	HAMMER CL PLUS	ACV
GRDC210	HARTOG	ACV
GRDC211	HB88I-172	AGG
GRDC212	HERON	ACV
GRDC213	HG-35	AGG
GRDC214	IG43428	AGG
GRDC215	JANZ	ACV
GRDC216	KAZAKHSTANSKAJA126	AGG
GRDC217	KENNEDY	ACV
GRDC218	KHARCHIA65	ACV
GRDC219	KINSEI	ACV
GRDC220	KIORA	ACV
GRDC221	KITE	ACV
GRDC222	KOPARA73	AGG
GRDC223	KORD CL PLUS	ACV
GRDC224	KRICHAUFF	ACV
GRDC225	LIVINGSTON	ACV
GRDC226	LRPB ARROW	ACV
GRDC227	LRPB FLANKER	ACV
GRDC228	LRPB HAVOC	ACV
GRDC229	LRPB IMPALA	ACV
GRDC230	LRPB LANCER	ACV
GRDC231	LRPB MUSTANG	ACV
GRDC232	LRPB NYALA	ACV
GRDC233	LRPB ORYX	ACV
GRDC234	LRPB RAIDER	ACV
GRDC235	LRPB RELIANT	ACV
GRDC236	LRPB SCOUT	ACV
GRDC237	LRPB SPITFIRE	ACV
GRDC238	LRPB TROJAN	ACV
GRDC239	LRPB COBRA	ACV
GRDC240	LRPB DUAL	ACV
GRDC241	LRPB HELLFIRE	ACV
GRDC242	LRPB PARAKEET	ACV
GRDC243	LRPB STEALTH	ACV
GRDC244	LU26S	AGG
GRDC245	MACE	ACV
GRDC246	MACHETE	ACV
GRDC247	MAHONDEMIAS	AGG
GRDC248	MERINDA	ACV
GRDC249	MITCH	ACV
GRDC250	NAPOSTA	ACV
GRDC251	NINJA	ACV
GRDC252	OLYMPIC	ACV
GRDC253	OXLEY	ACV
GRDC254	PI178704	AGG
GRDC255	QAL20000	ACV
GRDC256	R-BYDV	AGG
GRDC257	REBEL 65	ACV
GRDC258	Revenue	ACV
GRDC259	ROCKSTAR	ACV
GRDC260	SCEPTER	ACV
GRDC261	SEA CONDAMINE	ACV
GRDC262	SELOFHOURANI27	AGG
GRDC263	SHERIFF CL PLUS	ACV
GRDC264	SILVERSTAR	ACV
GRDC265	SOCIEDADNACION	AGG
GRDC266	SONNENWEIZEN	AGG
GRDC267	SPEAR	ACV
GRDC268	STING	ACV
GRDC269	SUNBLADE CL PLUS	ACV
GRDC270	SUNCENTRAL	ACV
GRDC271	SUNCHASER	ACV
GRDC272	SUNCO	ACV
GRDC273	SUNECA	ACV
GRDC274	SUNFLEX	ACV
GRDC275	SUNGUARD	ACV
GRDC276	SUNLAMB	ACV
GRDC277	SUNLIN	ACV
GRDC278	SUNMASTER	ACV
GRDC279	SUNMATE	ACV
GRDC280	SUNPRIME	ACV
GRDC281	SUNSTATE	ACV
GRDC282	SUNTIME	ACV
GRDC283	SUNTOP	ACV
GRDC284	SUNVALE	ACV
GRDC285	SUNVEX	ACV
GRDC286	SUNZELL	ACV
GRDC287	SUPREME	ACV
GRDC288	SW9550192	AGG
GRDC289	SW9550213	AGG
GRDC290	TAJAZNAJA4	AGG
GRDC291	TIMGALEN	ACV
GRDC292	TIMSON	ACV
GRDC293	TUNGSTEN	ACV
GRDC294	VENTURA	ACV
GRDC295	VIXEN	ACV
GRDC296	VULCAN	ACV
GRDC297	W5013EY-11-1	AGG
GRDC298	W5924DT-34	AGG
GRDC299	WALLUP	ACV
GRDC300	WEDIN	ACV
GRDC301	wheat-2HBYDV	CCV
GRDC302	WYALKATCHEM	ACV
GRDC303	X-259	CCV
GRDC304	X-260	CCV
GRDC305	X-262	CCV
GRDC306	Yannong19	CCV
GRDC307	YENDA	ACV
GRDC308	YITPI	ACV
GRDC309	YM58	CCV
GRDC310	YOUNG	ACV
GRDC311	YRODY1006	AGG
GRDC312	Yu-01	CCV
GRDC313	Yu-02	CCV
GRDC314	Yu-06	CCV
GRDC315	Yu-08	CCV
GRDC316	Yu-10	CCV
GRDC317	Yu-11	CCV
GRDC318	Yu-12	CCV
GRDC319	ZEN	ACV

## Sheet: Table S2_previous_SNPs
Table S2. List of previously identified SNPs and markers linked to pollen viability score, grain yield, and heat stress tolerance traits in wheat
Traits	chr	SNPs/Markers	Pos (MB)	Phenotypic variance explained(%)	References
Stress susceptible index	1B	gwm190	0	44.3	https://www.sid.ir/en/journal/ViewPaper.aspx?id=108202
Heat susceptibility index for days to anthesis	1B	wPt3227, wPt0705	3.6	13.2	https://www.sciencedirect.com/science/article/abs/pii/S0378429013002748
Productive tiller	1B	1265440|F|0	4.5	18	https://onlinelibrary.wiley.com/doi/full/10.1111/pbr.12405
Flag leaf cuticular waxes	1B	wmc419	14.2	10	https://link.springer.com/article/10.1007/s10681-014-1193-2
Grain filling duration	1B	2249474|F|0	18.5	15	https://onlinelibrary.wiley.com/doi/full/10.1111/pbr.12405
Heat tolerance	1B	tplb0060j17_1091	28.1	19.1463	https://doi.org/10.1371/journal.pone.0213407
Heat tolerance	1B	Kukri_c143_1116	29.6	21.6682	https://doi.org/10.1371/journal.pone.0213407
Heat tolerance	1B	Excalibur_rep_c105463_330	31.1	23.2242	https://doi.org/10.1371/journal.pone.0213407
Heat tolerance	1B	BS00022192_51	37	18.3731	https://doi.org/10.1371/journal.pone.0213407
Heat tolerance	1B	Tdurum_contig69600_415	37.7	18.3731	https://doi.org/10.1371/journal.pone.0213407
Plant height	1B	Excalibur_c10111_85	38.5	13.2	https://www.frontiersin.org/articles/10.3389/fpls.2018.00529/full
Heat susceptibility index for kernel weight of main spike	1B	gwm153	39.4	10.1	https://link.springer.com/article/10.1007/s10681-011-0349-6
Pollen vaiability score	1B	AVRIG15341	43.1193	20.3082	This study
Plant height	1B	bar308b	79.7	15.9	https://www.frontiersin.org/articles/10.3389/fpls.2018.00529/full
Grain yield per plant	1B	AX111125138, AX95194017	100.5	22.55	https://doi.org/10.1111/pce.13577
Thousand grain weight	2A	BS00089497_51	21	36.1107	https://link.springer.com/article/10.1007/s11032-019-0938-y
Grain number per square meter	2A	BS00089497_51	22	10.5222	https://link.springer.com/article/10.1007/s11032-019-0938-y
Grain number per square meter	2A	Kukri_c22235_1547	23	17.3509	https://link.springer.com/article/10.1007/s11032-019-0938-y
Thousand grain weight	2A	Kukri_c22235_1547	24	27.4878	https://link.springer.com/article/10.1007/s11032-019-0938-y
Pollen viability score	2A	AVRIG17433	34.6493		This study
Thousand grain weight	2A	Kukri_c4027_151	98	14.2565	https://link.springer.com/article/10.1007/s11032-019-0938-y
Chlorophyll content at 15 days after anthesis	2A	gwm372	144	12.57	https://link.springer.com/article/10.1007/s10535-018-0811-6
Grain number/spike	2A	Gwm372	149.01	23.16	https://www.ncbi.nlm.nih.gov/pmc/articles/PMC5736223/
Grain number/spike	2A	Gwm448	165.01	17.02	https://www.ncbi.nlm.nih.gov/pmc/articles/PMC5736223/
Heat susceptibility index for thousand kernel weight	2A	Gwm122	168.01	12.13	https://www.ncbi.nlm.nih.gov/pmc/articles/PMC5736223/
Grain weight/spike	2A	Gwm122	171.41	13.11	https://www.ncbi.nlm.nih.gov/pmc/articles/PMC5736223/
Pollen viability score	2A	AVRIG18520	748.855		This study
Pollen vaiability score	3A	AVRIG21657	106.776	11.9047	This study
Stress tolerance index	3A	GENE4277_295	51.36	18.9782	https://doi.org/10.1371/journal.pone.0213407
Yield	3A	BARC0324, WPT4077	62.9	8	https://link.springer.com/article/10.1007/s00122-012-1927-2
Heat tolerance	3A	RFL_Contig854_2253	81.91	23.6651	https://doi.org/10.1371/journal.pone.0213407
Flag leaf length	3A	wsnp_Ex_c14340_22315611	89.48	20.5387	https://doi.org/10.1371/journal.pone.0213407
Grain number per square meter	3A	1025708	143	25.3481	https://link.springer.com/article/10.1007/s11032-019-0938-y
Heat tolerance	3A	Kukri_c10757_183	209.25	19.3196	https://doi.org/10.1371/journal.pone.0213407
Fm maximum fluorescence	4A	Xwmc89	0	11.9	https://link.springer.com/article/10.1007/s10681-014-1283-1
Water soluble carbohydrates	4A	act.cag 3, agg.cta 12	13.1	10.47	https://link.springer.com/article/10.1007/s12298-018-0590-8
Grain yield	4A	Ex_c17894_1159	48.52	22.0301	https://doi.org/10.1371/journal.pone.0213407
Stress tolerance index	4A	BS00095225_51	67.72	19.7019	https://doi.org/10.1371/journal.pone.0213407
Stress tolerance index	4A	RAC875_c8932_740	71.47	19.9175	https://doi.org/10.1371/journal.pone.0213407
Spikes per plant	4A	AX109301508, AX111728458	110	10.0916	https://doi.org/10.1111/pce.13577
Heat susceptibility index for single kernel weight main spike	4A	wmc313	115.2	12.3	https://link.springer.com/article/10.1007/s10681-011-0349-6
Spikelet fertility	4A	AVRIG25392	680.096		This study
Pollen viability score	4A	Wx-B1-SNP2	690.27		This study
Grain Filling Duration	4B	wPt6209, wPt7062	2.2	8.43	https://www.sciencedirect.com/science/article/abs/pii/S0378429013002748
Cytoplasmic membrane stability	4B	wPt1708, wmc048a	9.3	10.02	https://link.springer.com/article/10.1007/s12298-018-0590-8
Spikelet fertility	4B	AVRIG25715	40.1413		This stidu
Pollen vaiability score	4B	AVRIG25720	42.0282		This study
Thousand grain weight	4B	BS00011510_51	42.1	14	https://www.frontiersin.org/articles/10.3389/fpls.2018.00529/full
Stress tolerance index	4B	Excalibur_c2454_333	42.91	17.6612	https://doi.org/10.1371/journal.pone.0213407
Thousand grain weight	4B	BobWhite_c20051_53	49	14	https://www.frontiersin.org/articles/10.3389/fpls.2018.00529/full
Yield	4B	WPT0391, WPT3608	53.1	8	https://link.springer.com/article/10.1007/s00122-012-1927-2
Spikelets per spike	4B	Tdurum_contig33737_157	55.96	15.3139	https://doi.org/10.1371/journal.pone.0213407
Days to maturity	4B	GENE2129_76	62.92	21.3832	https://doi.org/10.1371/journal.pone.0213407
Shoot dry weight	4B	Ku, c24961, 1176	71	9.8	https://doi.org/10.1111/nph.14367
Thousand grain weight	4B	BS00084904_51	72.2	8	https://www.frontiersin.org/articles/10.3389/fpls.2018.00529/full
Thousand grain weight	4B	Kukri_c61940_259	78.1	9	https://www.frontiersin.org/articles/10.3389/fpls.2018.00529/full
Shoot dry weight	4B	Kukri, c32958, 390	81	8.8	https://doi.org/10.1111/nph.14367
Stress tolerance index	4B	IAAV1743	99.79	19.4931	https://doi.org/10.1371/journal.pone.0213407
Heat susceptibility index for thousand grain weight	4B	WMC652	119.1	9	https://www.frontiersin.org/articles/10.3389/fpls.2018.00529/full
Heat susceptibility index for thousand grain weight	4B	gpw7390	120.8	9	https://www.frontiersin.org/articles/10.3389/fpls.2018.00529/full
Heat susceptibility index for single kernel weight main spike	5A	gwm443	0	5.8	https://link.springer.com/article/10.1007/s10681-011-0349-6
Flag leaf cuticular waxes	5A	wmc713	7.2	12	https://link.springer.com/article/10.1007/s10681-014-1193-2
Flag leaf cuticular waxes	5A	gwm205	12.1	10	https://link.springer.com/article/10.1007/s10681-014-1193-2
Biomass	5A	wsnp_BE500291A_Ta_2_1	15.61	19.1161	https://doi.org/10.1371/journal.pone.0213407
Temperature depression of flag leaf	5A	gwm154	18.4	11.3	https://link.springer.com/article/10.1007/s10681-011-0349-6
Normalized difference vegetation index at vagetative stage	5A	2351081	24	3.4534	https://link.springer.com/article/10.1007/s11032-019-0938-y
Spikelet fertility (early stage HS)	5A	AVRIG26861	24.5092	17.0903	This study
Temperature depression of main spike	5A	gwm293	26.7	8	https://link.springer.com/article/10.1007/s10681-014-1193-2
Thousand kernel weight	5A	AX94457108, AX94641073	28.8	6.986	https://doi.org/10.1111/pce.13577
Thousand grain weight	5A	BS00021708_51	35.8	4	https://www.frontiersin.org/articles/10.3389/fpls.2018.00529/full
Proline content	5A	aac.ctc 12, gwm304	38.8	5	https://link.springer.com/article/10.1007/s12298-018-0590-8
Grain number per spike	5A	RAC875_c15204_992	44.5	5	https://www.frontiersin.org/articles/10.3389/fpls.2018.00529/full
Temperature depression of flag leaf	5A	barc141	50.9	19	https://link.springer.com/article/10.1007/s10681-014-1193-2
Grain number per spike	5A	wsnp_JD_c1796_2496653	52.8	5	https://www.frontiersin.org/articles/10.3389/fpls.2018.00529/full
Grain yield per plant	5A	AX95630862, AX95630256	52.9	3.7642	https://doi.org/10.1111/pce.13577
Thousand kernel weight	5A	AX111764369, AX95659703	62	19.507	https://doi.org/10.1111/pce.13577
Grain yield	5A	barc193a, wPt1370	66.1	8.07	https://www.sciencedirect.com/science/article/abs/pii/S0378429013002748
Temperature depression of main spike	5A	gwm126	67.7	14.6	https://link.springer.com/article/10.1007/s10681-011-0349-6
Heat susceptibility index for kernel weight of main spike	5A	gwm179	70.5	12.2	https://link.springer.com/article/10.1007/s10681-011-0349-6
Shoot dry weight	5A	Tdurum, contig49576, 75	82	9.5	https://doi.org/10.1111/nph.14367
Temperature depression of main spike	5A	gwm595	86	8.8	https://link.springer.com/article/10.1007/s10681-011-0349-6
Stress tolerance index	5A	BS00110266_51	87.78	20.5565	https://doi.org/10.1371/journal.pone.0213407
Heat susceptibility index for kernel weight of main spike	5A	gwm291	102.8	11.4	https://link.springer.com/article/10.1007/s10681-011-0349-6
Grain filling duration	5A	1079678|F|0	107.5	17	https://onlinelibrary.wiley.com/doi/full/10.1111/pbr.12405
Yield	5A	CFA2141, WPT5231	165.7	5	https://link.springer.com/article/10.1007/s00122-012-1927-2
Leaf area	5B	wsnp_Ex_rep_c95506_83475785	40.55	18.0686	https://doi.org/10.1371/journal.pone.0213407
Heat susceptibility index for kernel number of main spike	5B	gwm408	51.9	13.4	https://link.springer.com/article/10.1007/s10681-011-0349-6
Biomass	5B	wsnp_Ex_c6748_11659366	60.31	18.2259	https://doi.org/10.1371/journal.pone.0213407
Chlorophyll content at 7 days after anthesis	5B	cfd20	79.4	10.57	https://link.springer.com/article/10.1007/s10535-018-0811-6
Stress susceptible index	5B	gwm133A	114	27.3	https://www.sid.ir/en/journal/ViewPaper.aspx?id=108202
Spikelet fertility	5B	AVRIG29108	595.298		This study
Heat susceptibility index for thousand grain weight	6B	gwm626, wPt4924	3	13.97	https://www.sciencedirect.com/science/article/abs/pii/S0378429013002748
Heat stress tolerance	6B	wsnp_Ex_c11573_18650189	9.1	12.1	https://link.springer.com/article/10.1186/s12870-016-0784-6
Grain yield per spike	6B	2280984|F|0	10	12	https://onlinelibrary.wiley.com/doi/full/10.1111/pbr.12405
Stress tolerance index	6B	Tdurum_contig5352_556	10.06	18.7875	https://doi.org/10.1371/journal.pone.0213407
Productive tiller	6B	1109194|F|0	35	20	https://onlinelibrary.wiley.com/doi/full/10.1111/pbr.12405
Grain number per square meter	6B	Tdurum_contig46828_730, wsnp_Ex_c1988_3742022	57	30.5552	https://link.springer.com/article/10.1007/s11032-019-0938-y
Thousand kernel weight	6B	AX111555258, Xwmc182	77.3	10.0311	https://doi.org/10.1111/pce.13577
Grain numbers	6B	AX95177681, AX94427873	87.2	11.7096	https://doi.org/10.1111/pce.13577
Grain numbers	6B	AX95177681, AX94427873	87.4	20.0088	https://doi.org/10.1111/pce.13577
Stress tolerance index	6B	TA002394, 1002	121.6	16.3656	https://doi.org/10.1371/journal.pone.0213407
Pollen viability score	6B	AVRIG31940	663.589		This study
Heat susceptibility index for single kernel weight main spike	6D	cfd49	0	14.7	https://link.springer.com/article/10.1007/s10681-011-0349-6
Spikelets per spike	6D	Excalibur_c4789_2748	9.47	18.7964	https://doi.org/10.1371/journal.pone.0213407
Temperature depression of main spike	6D	cfd42	31.2	32.1	https://link.springer.com/article/10.1007/s10681-011-0349-6
Canopy temperature at grain filling stage	6D	RAC875_c57371_238	73	31.3739	https://link.springer.com/article/10.1007/s11032-019-0938-y
Grain yield	6D	RAC875_c57371_238	73	23.8667	https://link.springer.com/article/10.1007/s11032-019-0938-y
Grain numbers	6D	AX111413674, Xgwm219	81.5	11.9578	https://doi.org/10.1111/pce.13577
Pollen viability score	6D	AVRIG32351	427.651		This study
Canopy temperature depression	7B	Xgwm1025	3.6	19.81	https://link.springer.com/article/10.1007/s00122-012-1853-3
Pollen viability score	7B	AVRIG34123	3.67264
Yield	7B	BARC0065	32.6	11	https://link.springer.com/article/10.1007/s00122-012-1927-2
normalized difference vegetation index at grain filling stage	7B	Excalibur_rep_c106939_325, BobWhite_c26534_532	43	11.566	https://link.springer.com/article/10.1007/s11032-019-0938-y
Grain number per square meter	7B	BobWhite_c26534_532, wsnp_Ex_c908_1754208	44	16.5757	https://link.springer.com/article/10.1007/s11032-019-0938-y
Grain number per square meter	7B	BobWhite_c26534_532, wsnp_Ex_c908_1754208	45	10.1526	https://link.springer.com/article/10.1007/s11032-019-0938-y
Grain yield	7B	BobWhite_c26534_532, wsnp_Ex_c908_1754208	49	25.6222	https://link.springer.com/article/10.1007/s11032-019-0938-y
Stress susceptible index	7B	gwm63B	78	34	https://www.sid.ir/en/journal/ViewPaper.aspx?id=108202
Grain yield	7B	Tdurum_contig13930_254	98.3	21.8669	https://doi.org/10.1371/journal.pone.0213407
Spikelets per spike	7B	BobWhite_c28058_232	134.06	19.7106	https://doi.org/10.1371/journal.pone.0213407
Harvest index	7B	RAC875_rep_c117259_207	143.23	18.4427	https://doi.org/10.1371/journal.pone.0213407
Spikelets per spike	7B	BS00076622_51	148.65	20.7245	https://doi.org/10.1371/journal.pone.0213407
Spikelets per spike	7B	IACX5767	150.6	21.6112	https://doi.org/10.1371/journal.pone.0213407
Grain yield	7B	RAC875_rep_c110526_324	163.3	21.4185	https://doi.org/10.1371/journal.pone.0213407

## Sheet: Table S3_Alleleic effect test
Table S3. Allelic effect of tolerant and susceptible allele on pollen viability score and spikelet fertility
Traits	Statistical parameters	SNP1 (AVRIG15341)	SNP2 (AVRIG17433)	SNP3 (AVRIG18520)	Combo_SNP_1_2	Combo_SNP_1_3
Pollen viability score	N (S)	160	282	291	144	142
	N (T)	159	32	26	20	9
	Mean (S)	4.81823	5.32191	5.32264	4.8098	4.70188
	Mean (T)	5.95283	6.06337	6.1656	6.68889	6.74691
	p.val	2.24128e-14	0.0091282	0.000222422	2.27524e-10	6.88302e-06
	Differences	1.1346	0.741461	0.842956	1.87909	2.04504
Spikelet fertility (early)	Statistical parameters	AVRIG26861	AVRIG29108	Combined
	N (S)	30	211	16
	N (T)	264	103	86
	Mean (S)	77.8033	106.742	74.6484
	Mean (T)	121.756	132.176	141.209
	Pvalue	3.96859e-05	0.000818233	0.000227373
	Differences	43.9522	25.4341	66.5609
